# Supplementary material for: Deciphering amino acid adsorption on PVC surface: insights from molecular dynamics and PMF calculations
Source: Royal Society of Chemistry journal article supplement (doi:10.1039/d4nj02730b), 2024-01-01
Supplement: d4nj02730b1.pdf [file d4nj02730b1.pdf]

Supporting Information:  
Deciphering Amino Acid Adsorption on PVC Surface:  
Insights from Molecular Dynamics and PMF  
Calculations

Amr H. Saleh, Patrice Malfreyt, Mehdi Sahihi\*

*<sup>a</sup>Universit Clermont Auvergne Clermont Auvergne INP CNRS Institut de Chimie de  
Clermont-Ferrand F-63000 Clermont-Ferrand France*

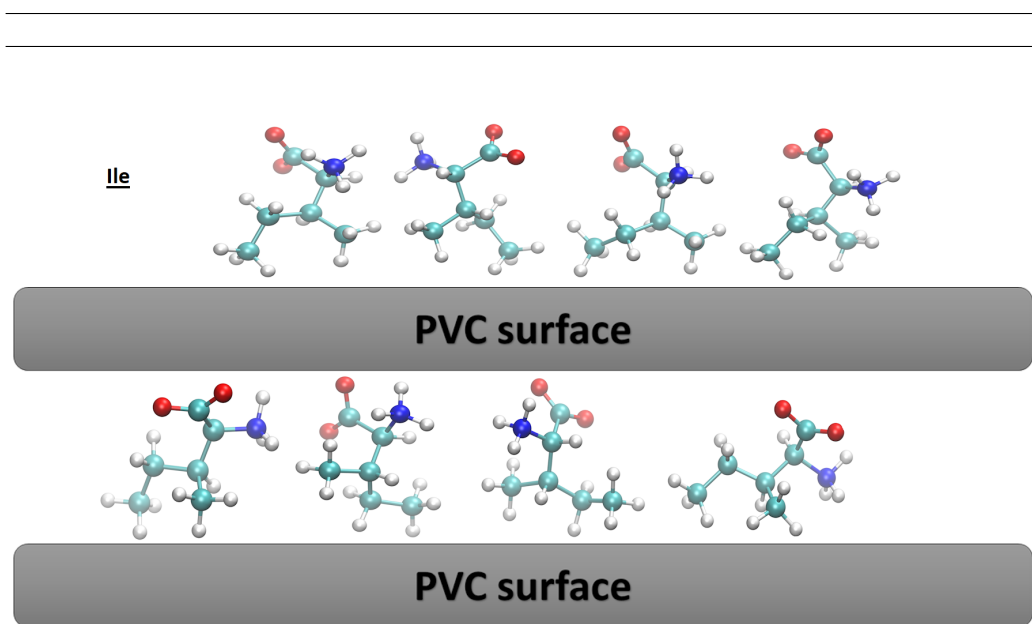

Figure S1: Configuration of the adsorbed Ile residues onto the PVC surface

---

\*Corresponding Author; Email: mehdi.sahihi@uca.fr

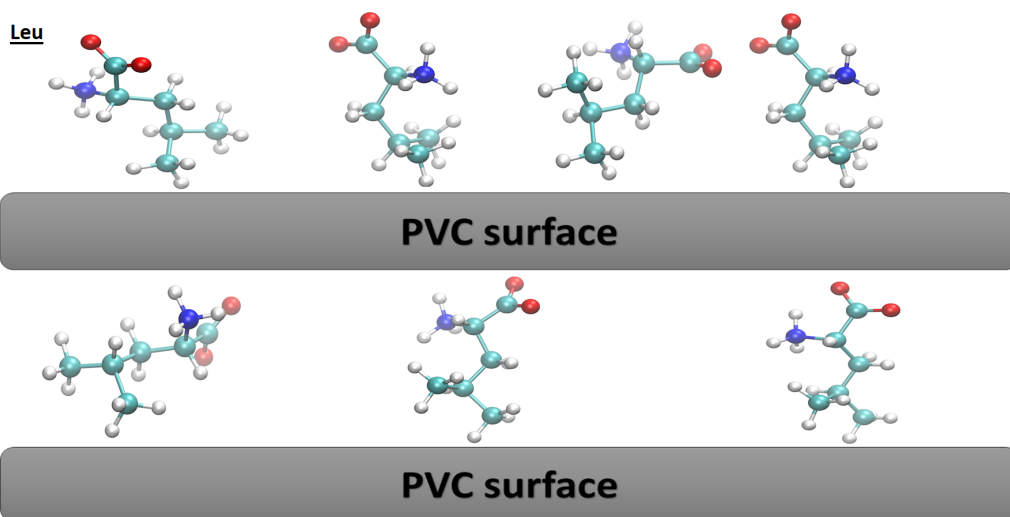

Figure S2: Configuration of the adsorbed Leu residues onto the PVC surface

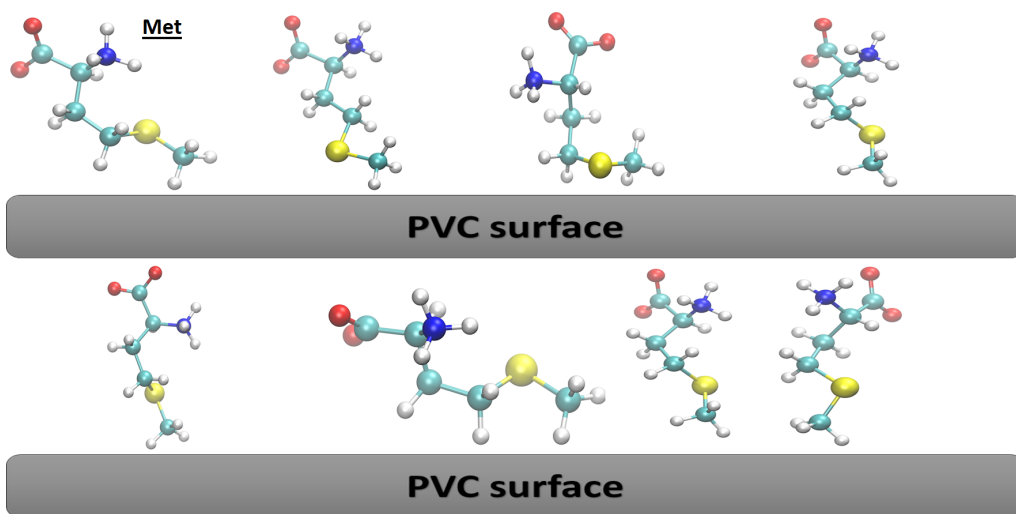

Figure S3: Configuration of the adsorbed Met residues onto the PVC surface

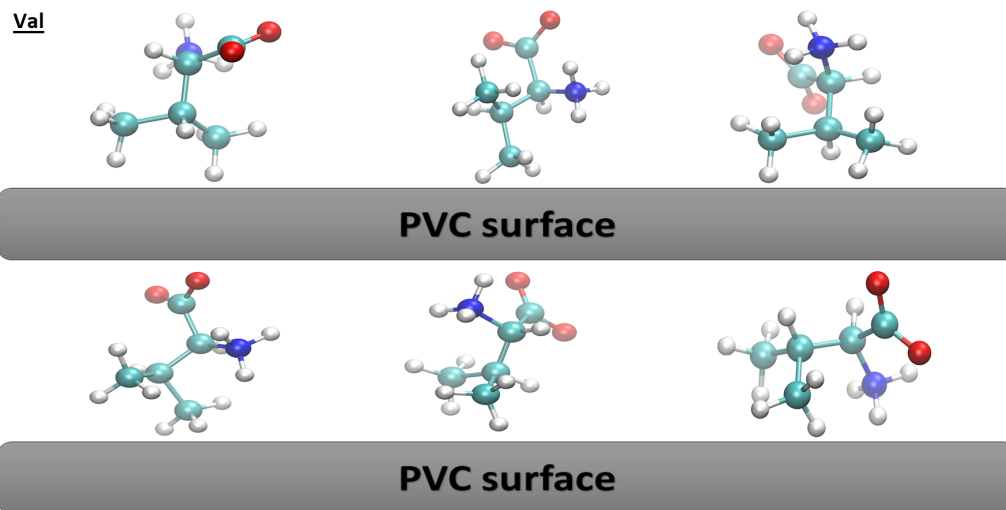

Figure S4: Configuration of the adsorbed Val residues onto the PVC surface

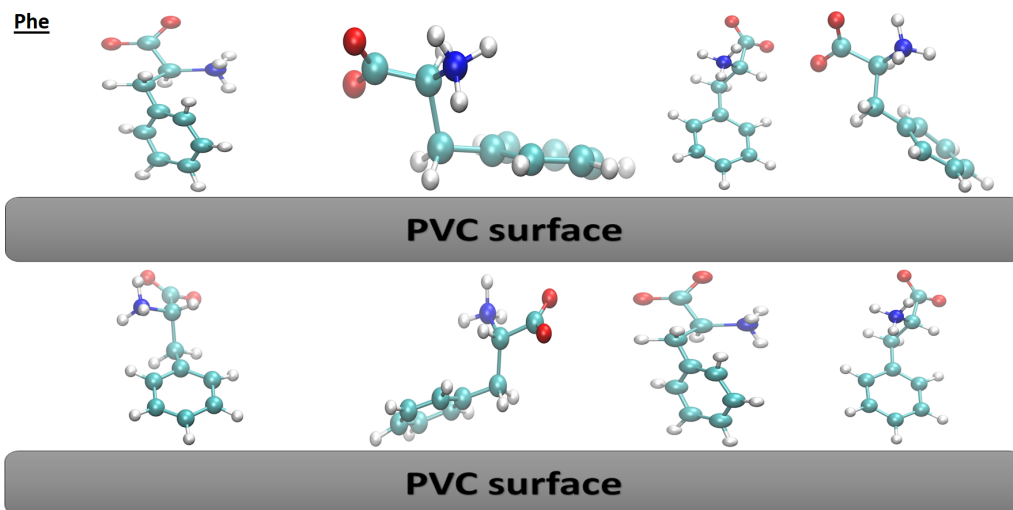

Figure S5: Configuration of the adsorbed Phe residues onto the PVC surface

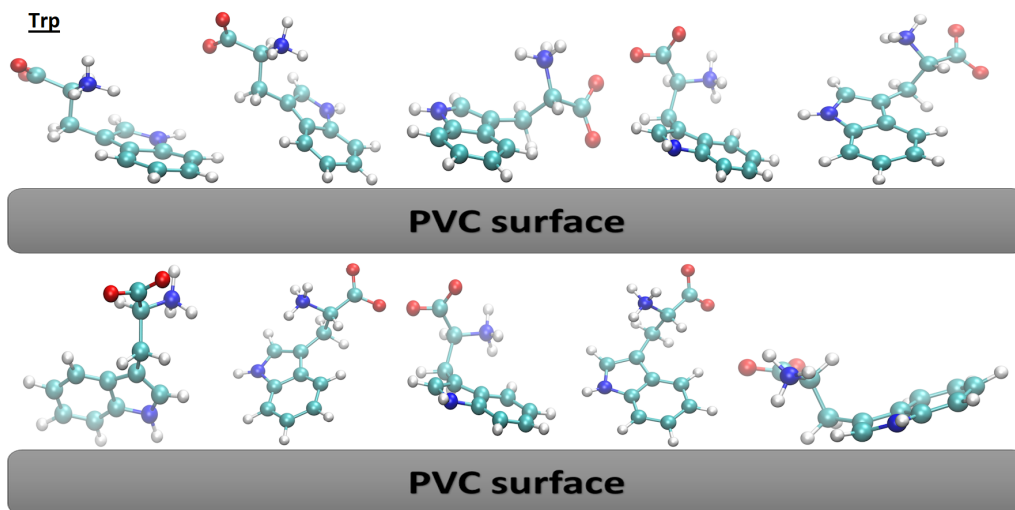

Figure S6: Configuration of the adsorbed Trp residues onto the PVC surface

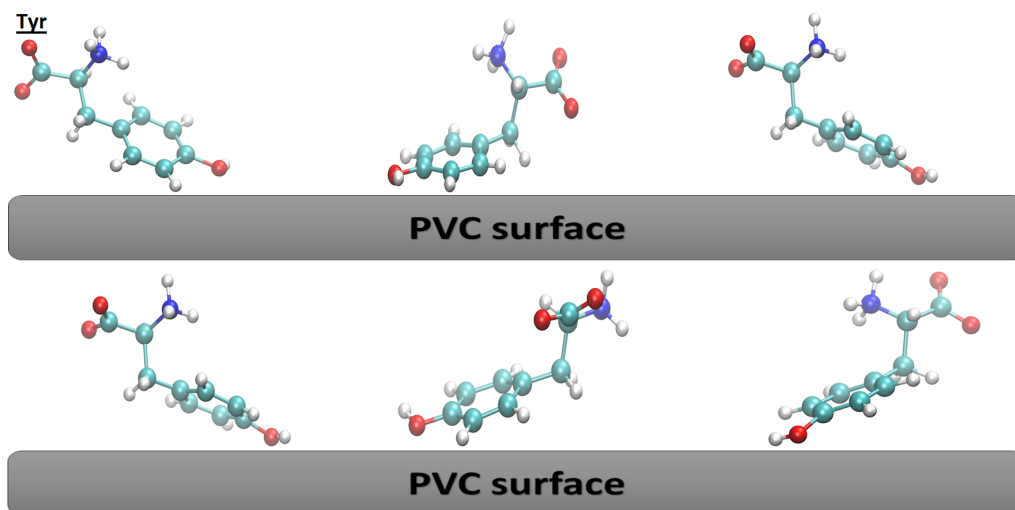

Figure S7: Configuration of the adsorbed Tyr residues onto the PVC surface

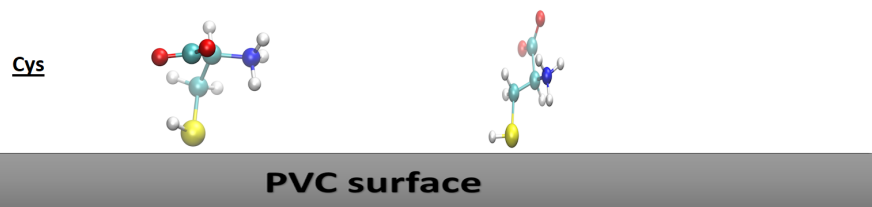

Figure S8: Configuration of the adsorbed Cys residues onto the PVC surface

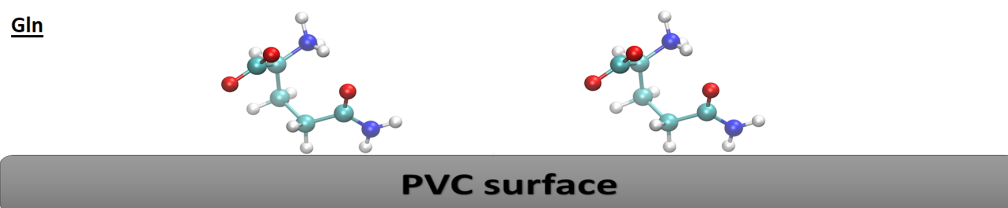

Figure S9: Configuration of the adsorbed Gln residues onto the PVC surface

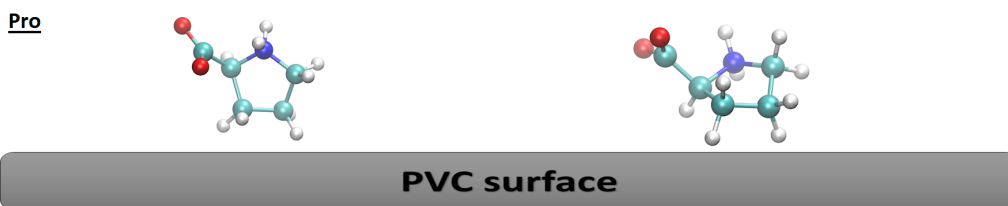

Figure S10: Configuration of the adsorbed Pro residues onto the PVC surface

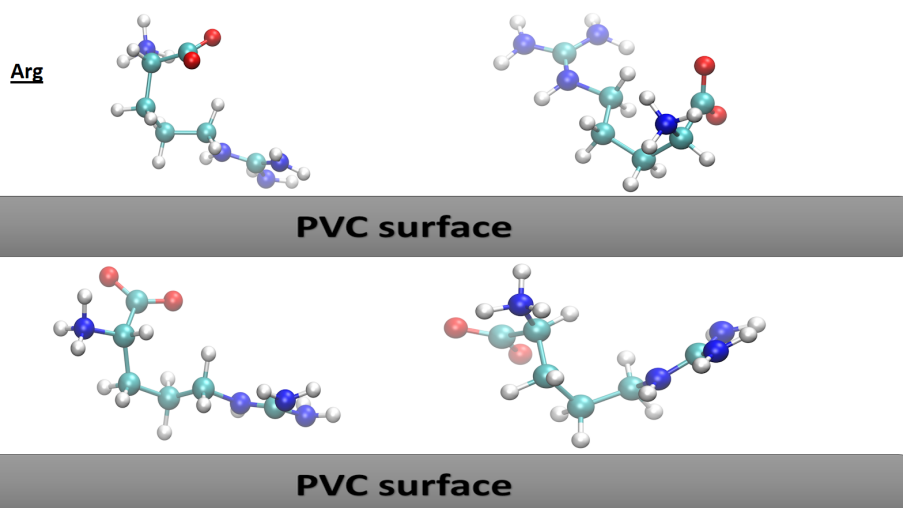

Figure S11: Configuration of the adsorbed Arg residues onto the PVC surface

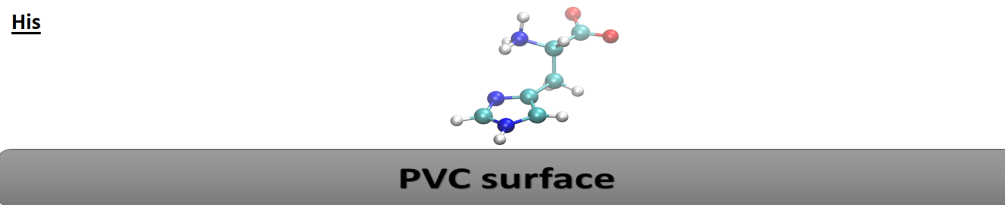

Figure S12: Configuration of the adsorbed His residues onto the PVC surface

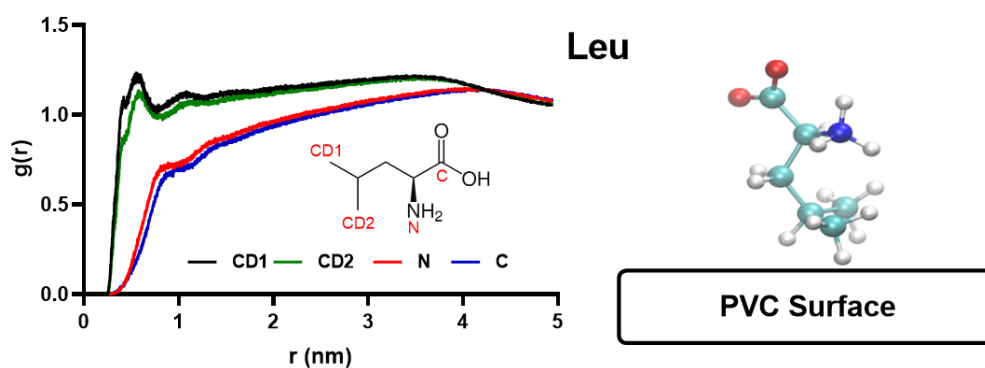

Figure S13: Radial distribution functions ( $g(r)$ ) of the atoms of Leu (left) and the selected orientation of adsorption on PVC surface taken from the last frame of MD simulation (right).

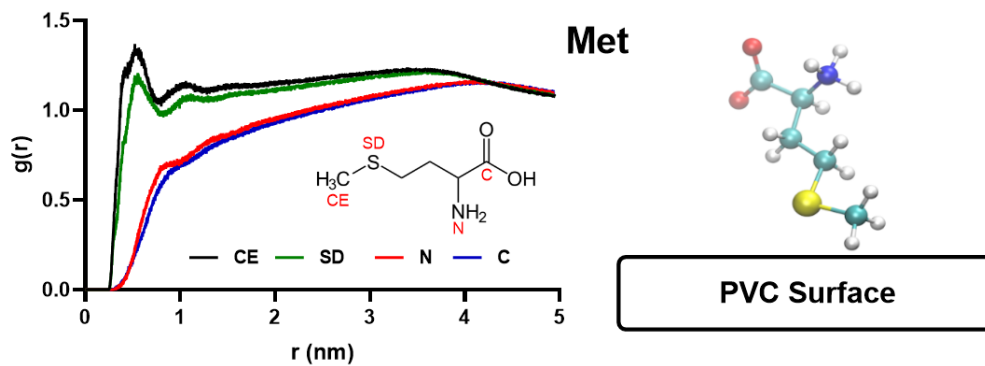

Figure S14: Radial distribution functions ( $g(r)$ ) of the atoms of Met (left) and the selected orientation of adsorption on PVC surface taken from the last frame of MD simulation (right).

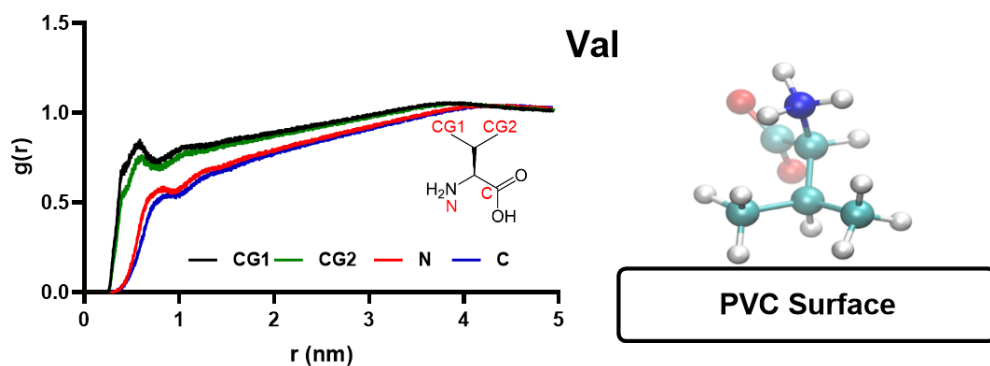

Figure S15: Radial distribution functions ( $g(r)$ ) of the atoms of Val (left) and the selected orientation of adsorption on PVC surface taken from the last frame of MD simulation (right).

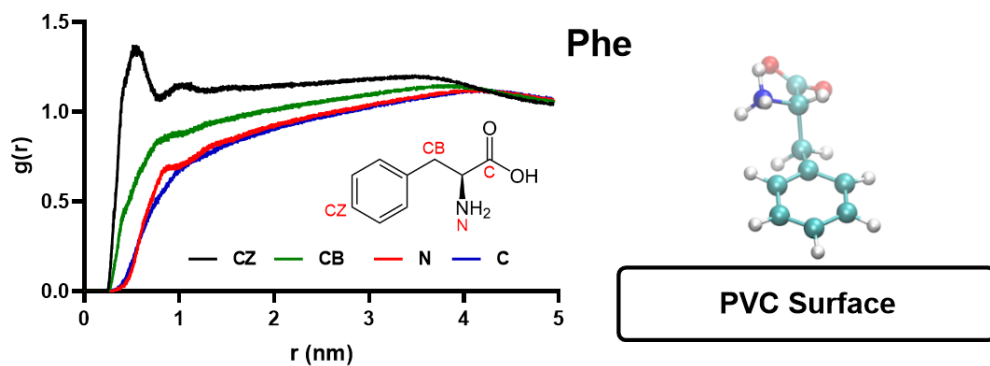

Figure S16: Radial distribution functions ( $g(r)$ ) of the atoms of Phe (left) and the selected orientation of adsorption on PVC surface taken from the last frame of MD simulation (right).

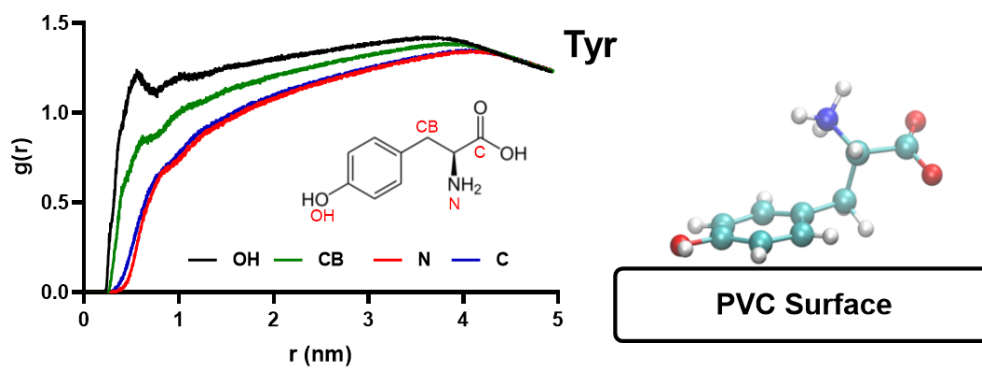

Figure S17: Radial distribution functions ( $g(r)$ ) of the atoms of Tyr (left) and the selected orientation of adsorption on PVC surface taken from the last frame of MD simulation (right).

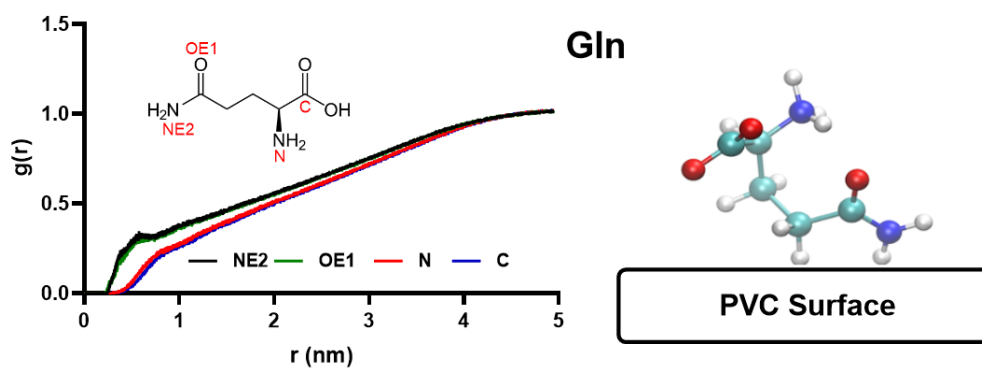

Figure S18: Radial distribution functions ( $g(r)$ ) of the atoms of Gln (left) and the selected orientation of adsorption on PVC surface taken from the last frame of MD simulation (right).



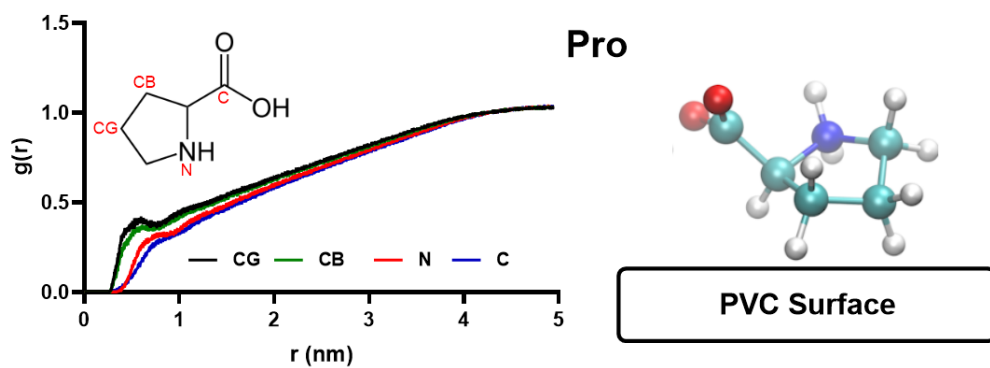

Figure S19: Radial distribution functions ( $g(r)$ ) of the atoms of Pro (left) and the selected orientation of adsorption on PVC surface taken from the last frame of MD simulation (right).

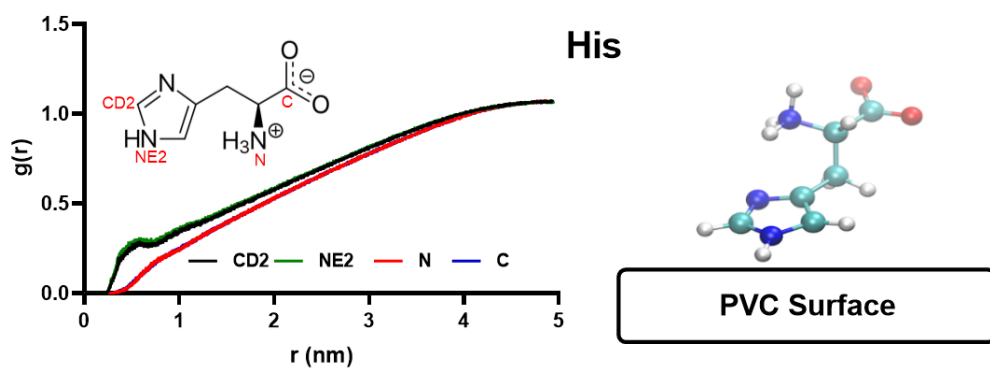

Figure S20: Radial distribution functions ( $g(r)$ ) of the atoms of His (left) and the selected orientation of adsorption on PVC surface taken from the last frame of MD simulation (right).
